# Supplementary figures and images for: Investigation of phase transition, mechanical behavior and lattice thermal conductivity of halogen perovskites using machine learning interatomic potentials
Source: Royal Society of Chemistry journal article supplement (doi:10.1039/d3cp04657e), 2023-01-01

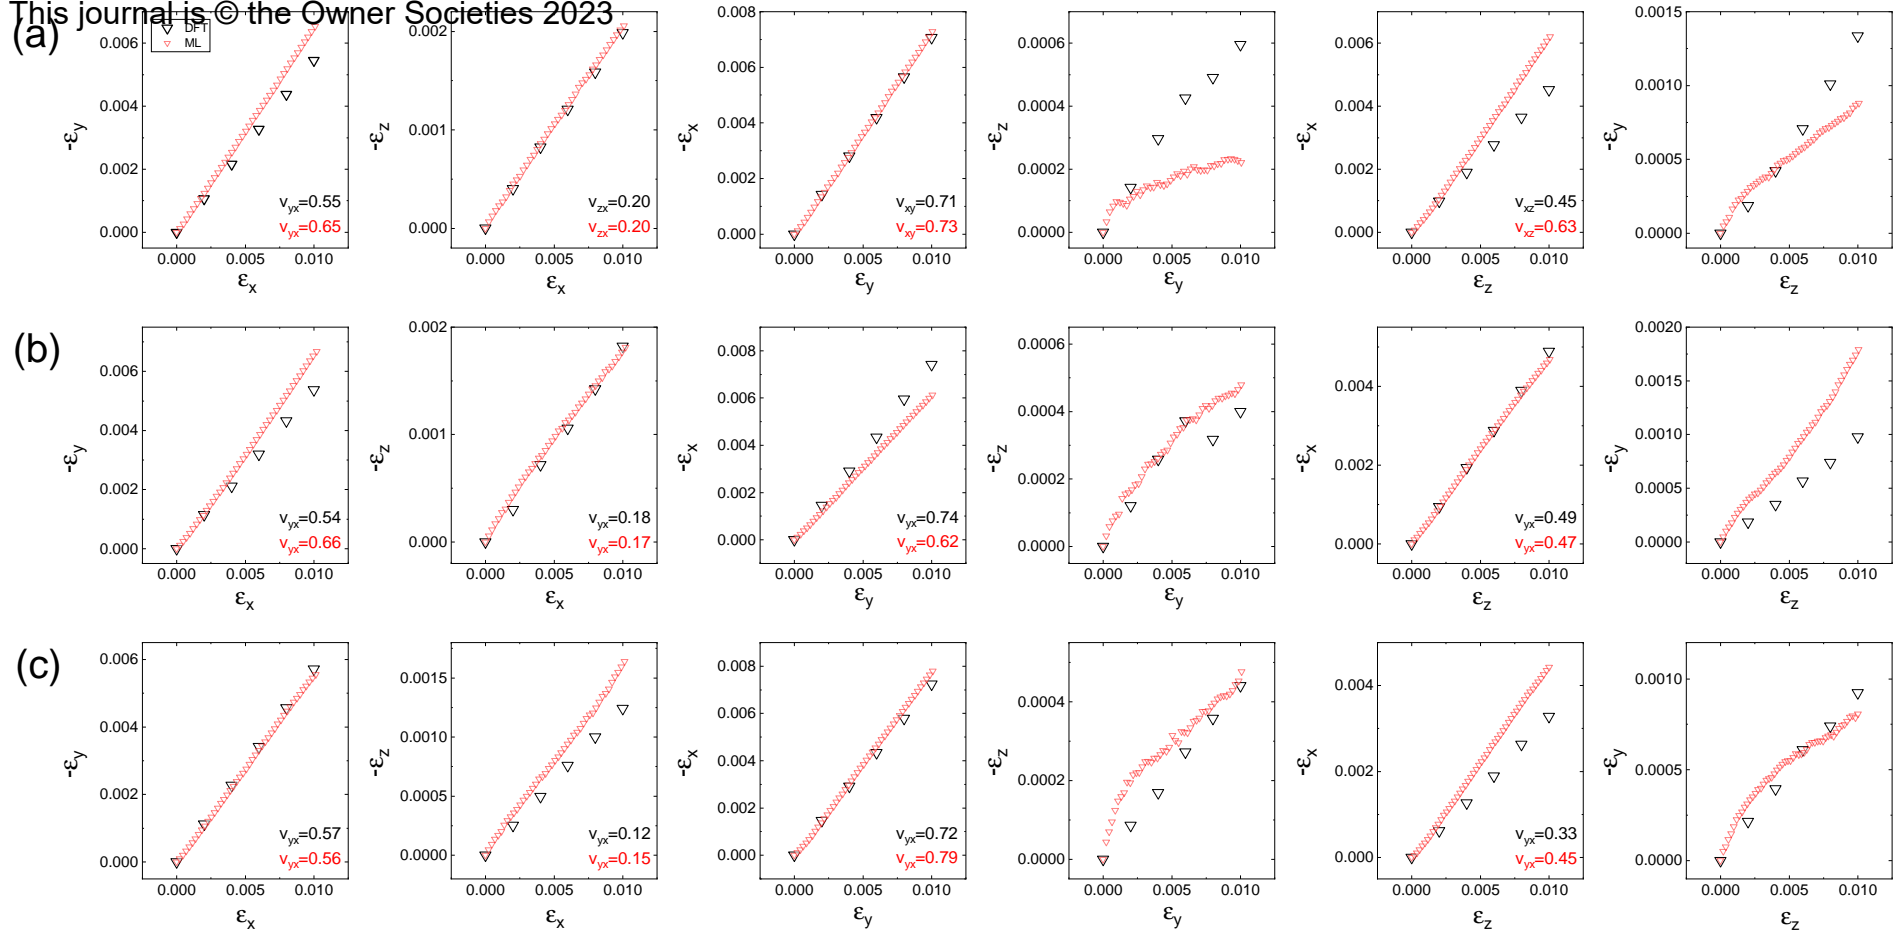

Supplement: d3cp04657e1.pdf [file d3cp04657e1.pdf]

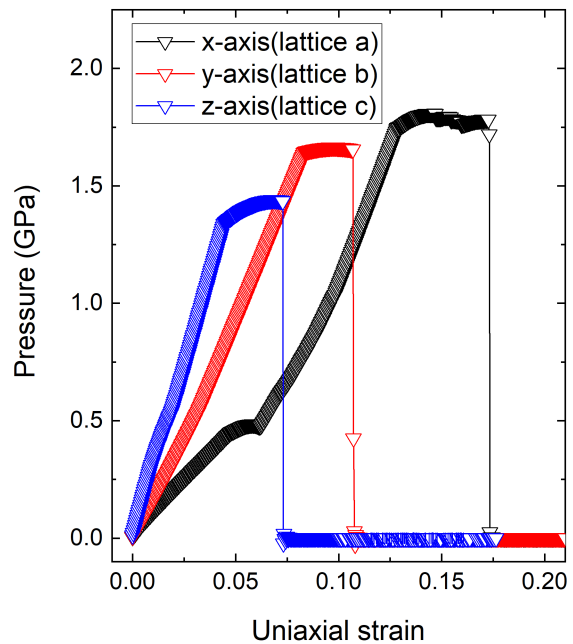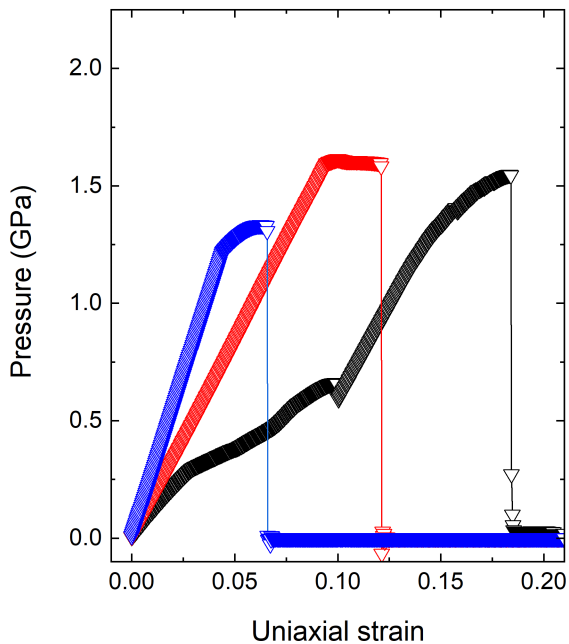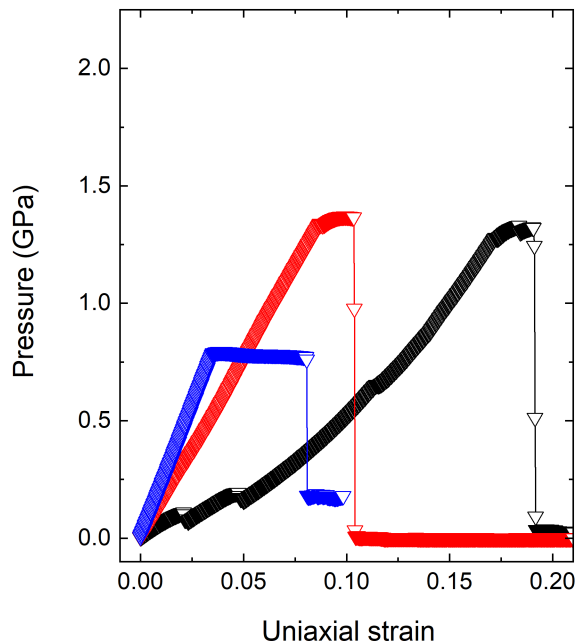

Supplement: d3cp04657e2.pdf [file d3cp04657e2.pdf]

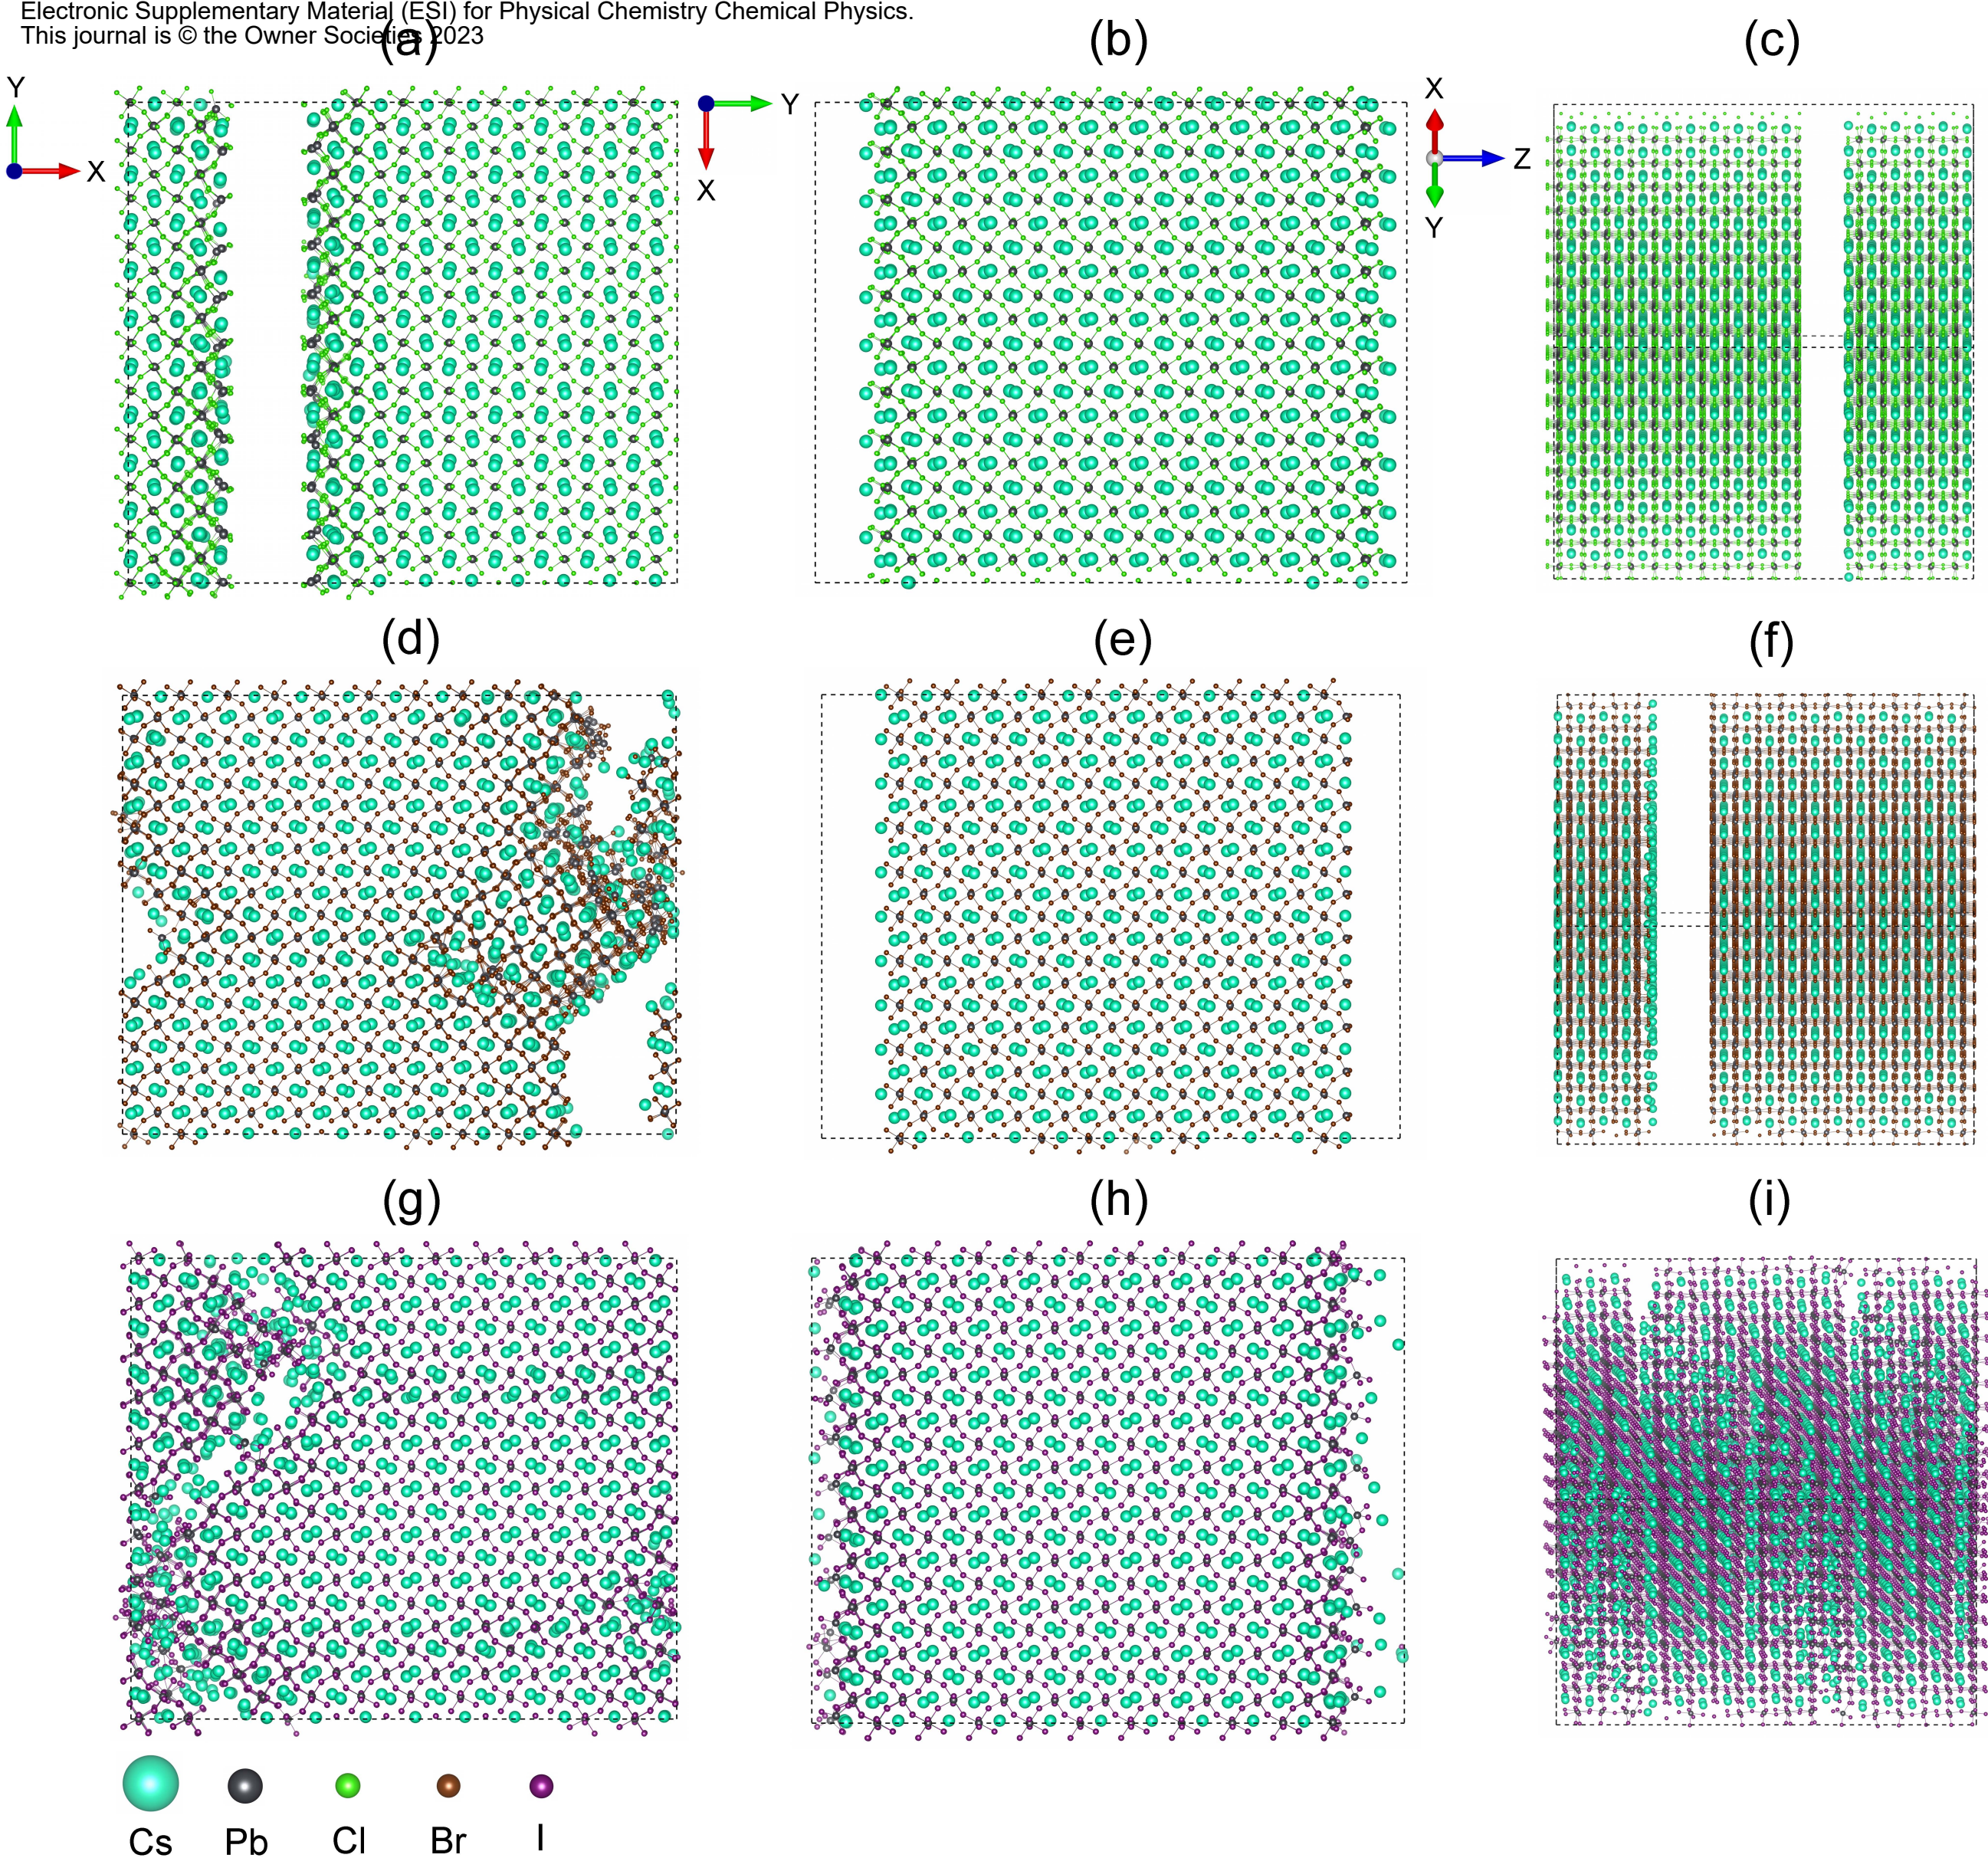

Supplement: d3cp04657e3.pdf [file d3cp04657e3.pdf]

(a)

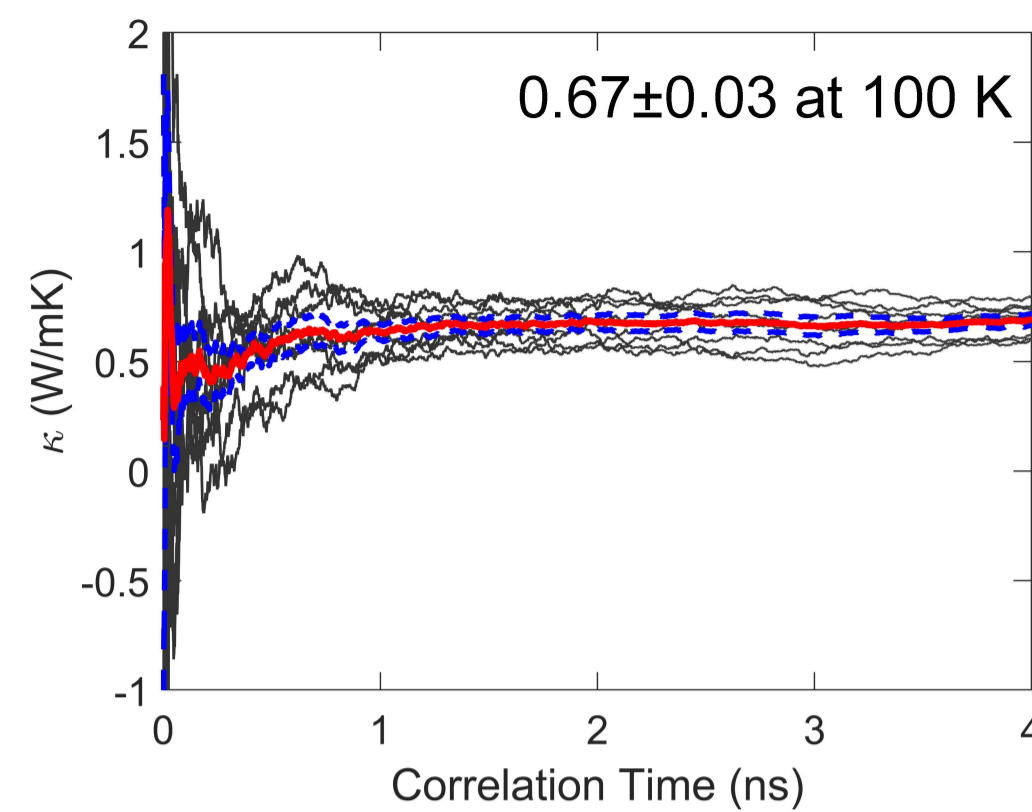

(b)

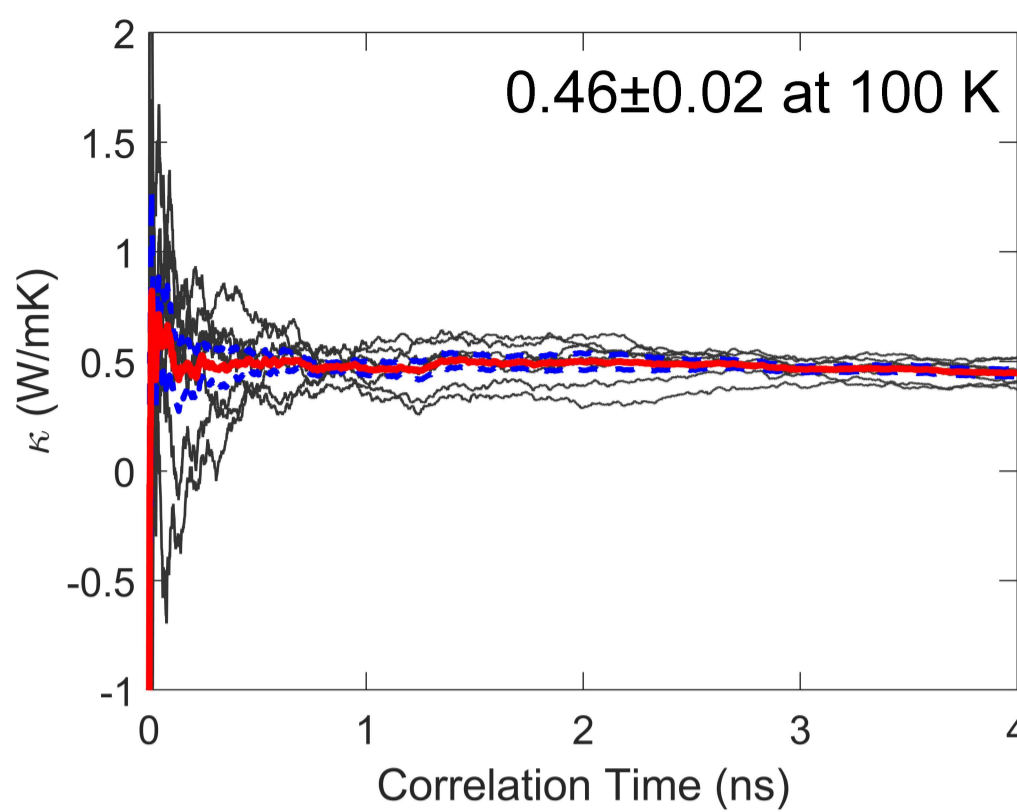

(c)

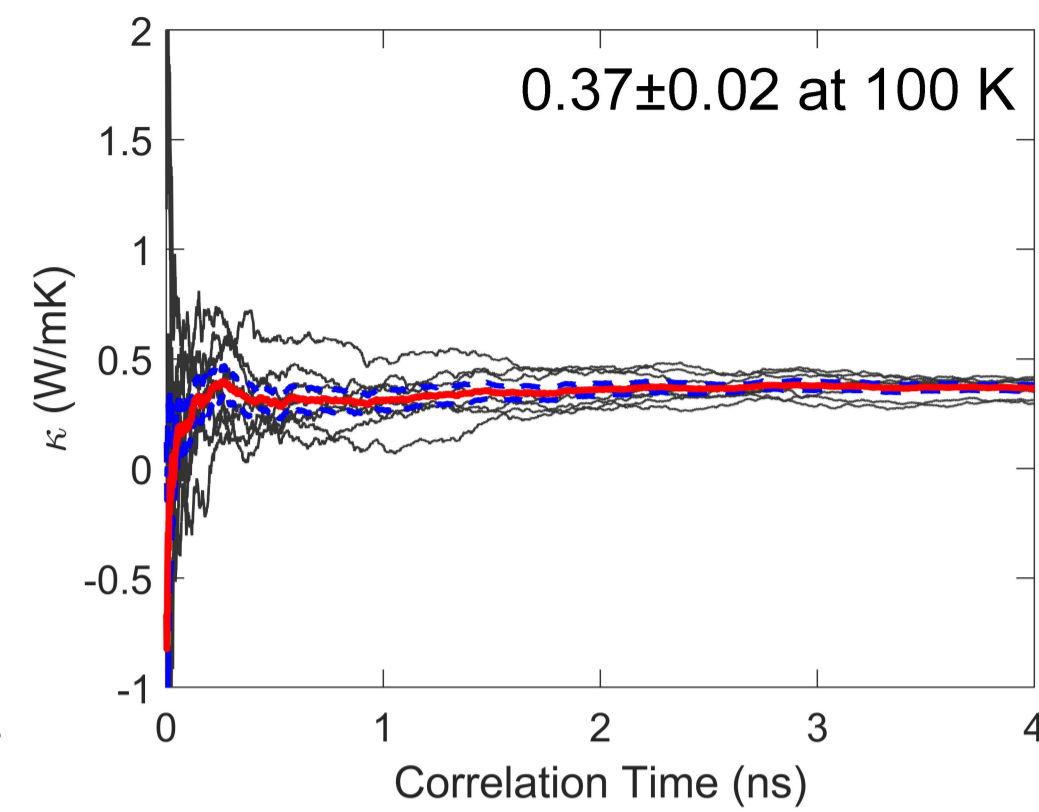

(d)

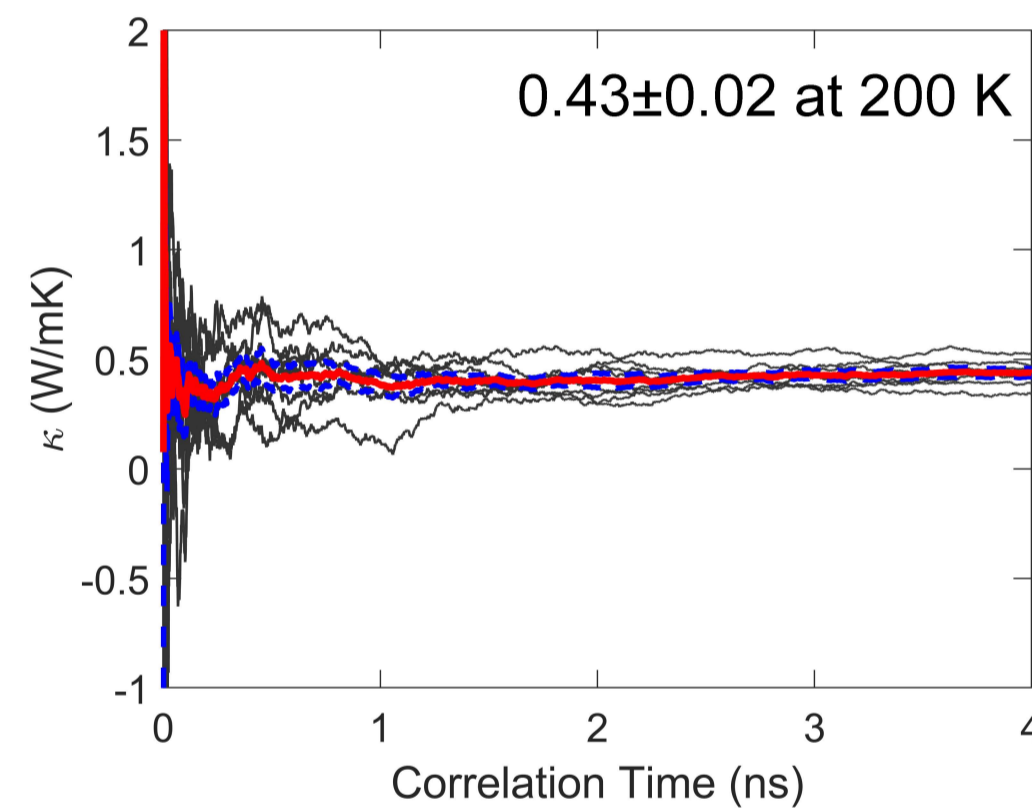

(e)

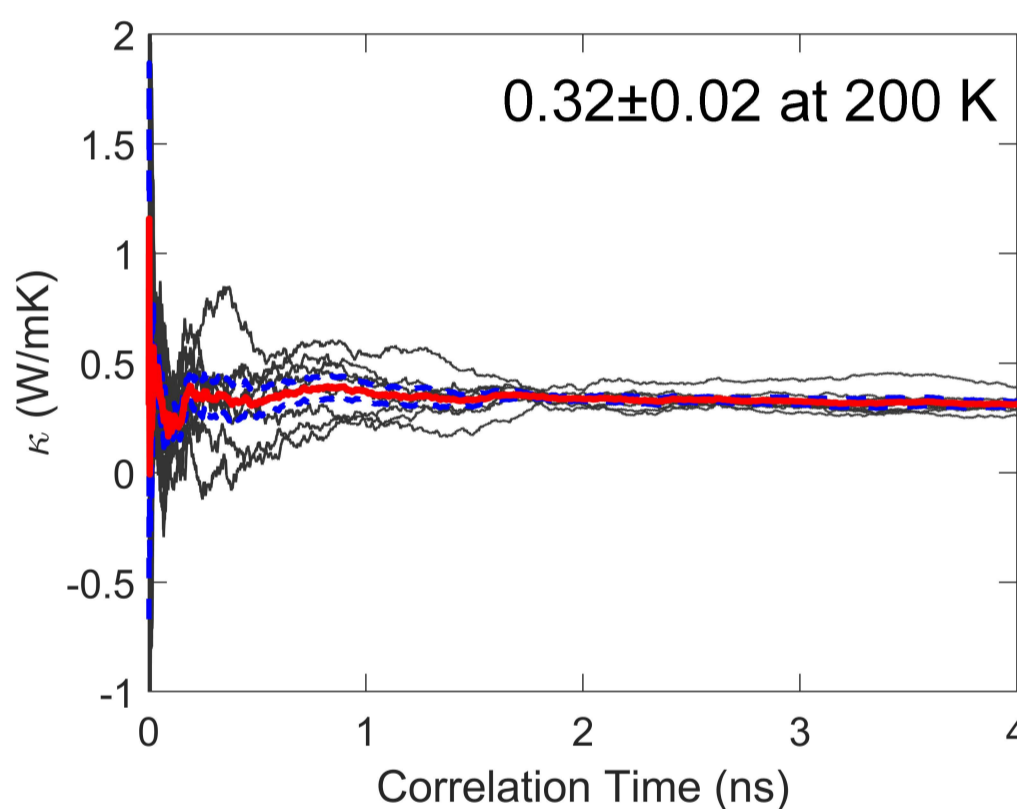

(f)

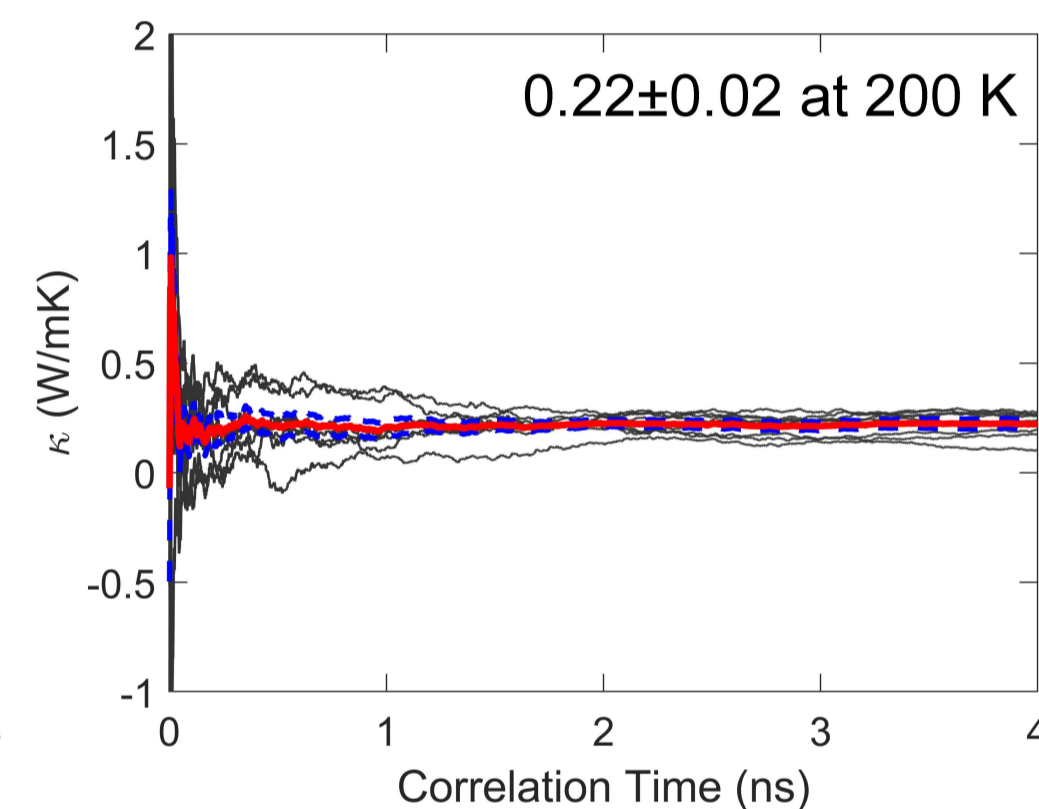

(g)

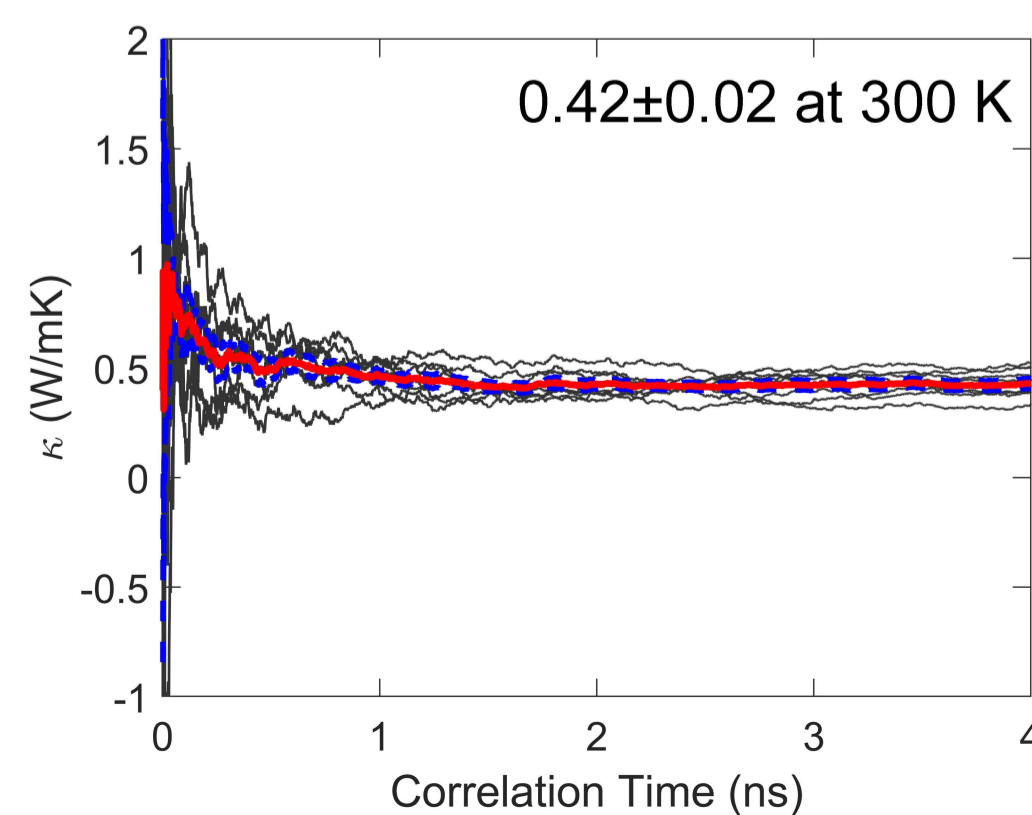

(h)

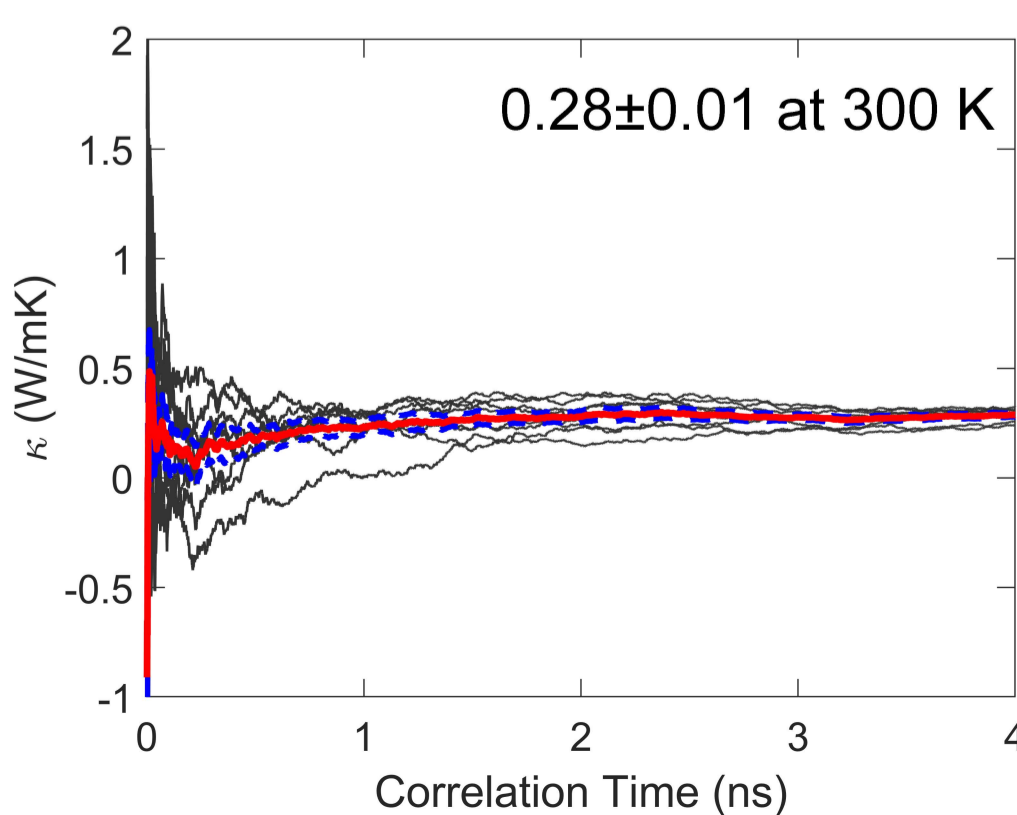

(i)

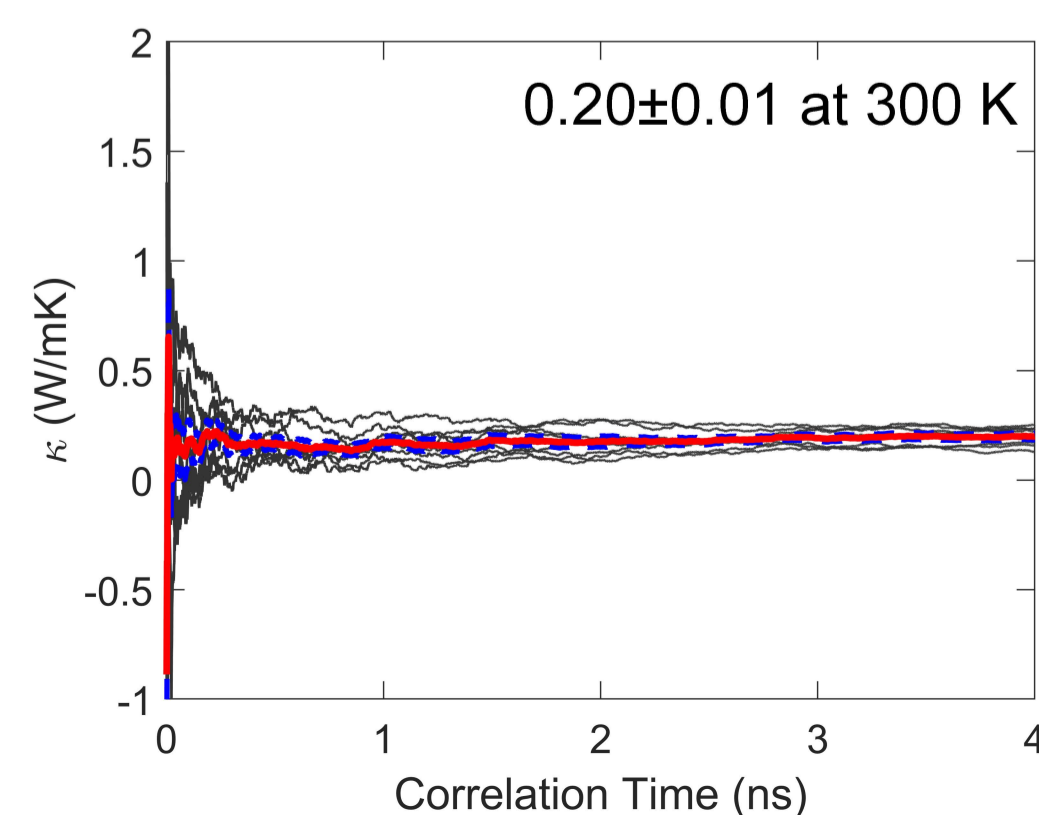

Supplement: d3cp04657e4.pdf [file d3cp04657e4.pdf]

(a)

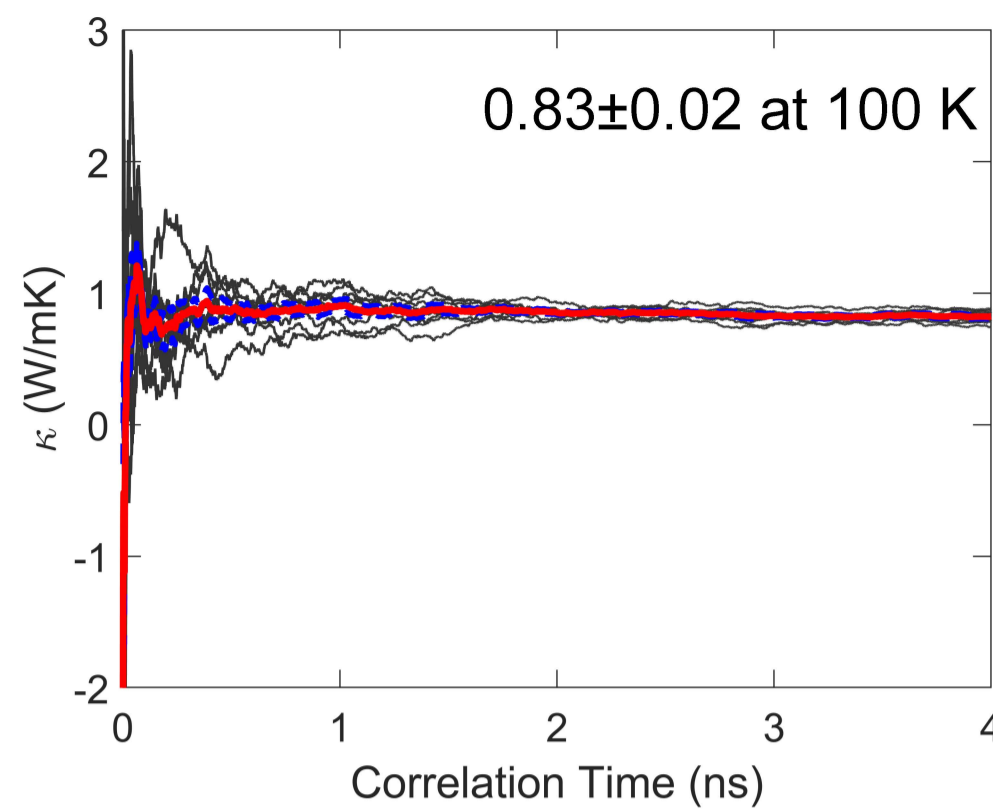

(b)

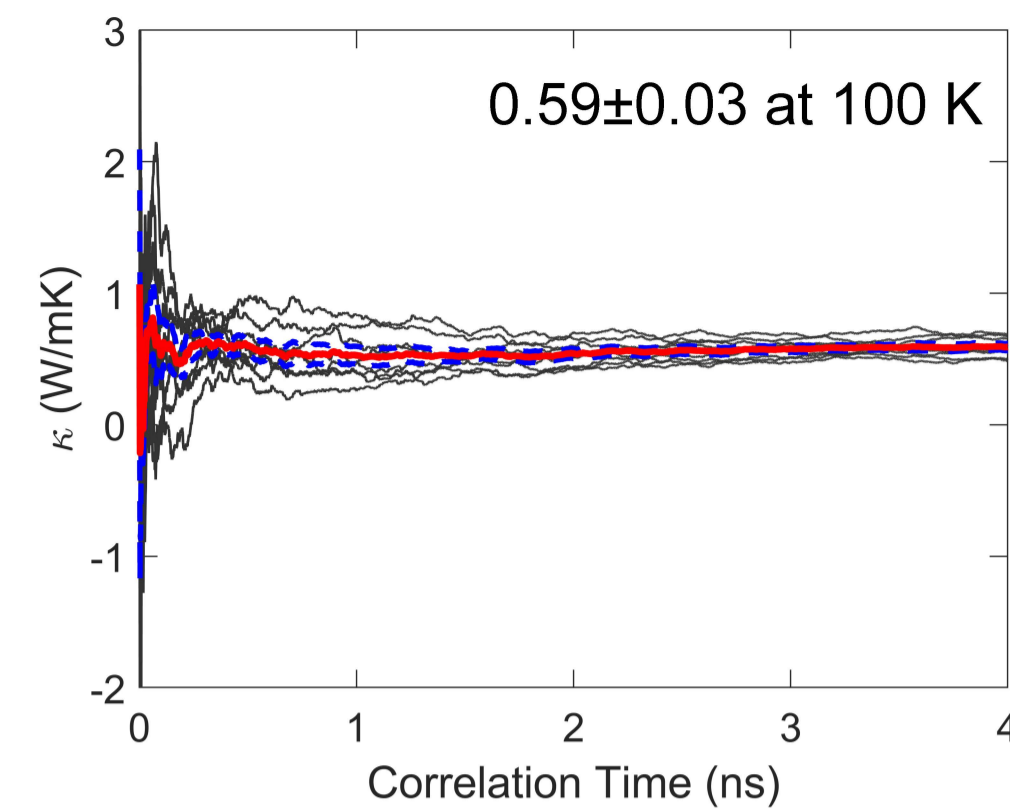

(c)

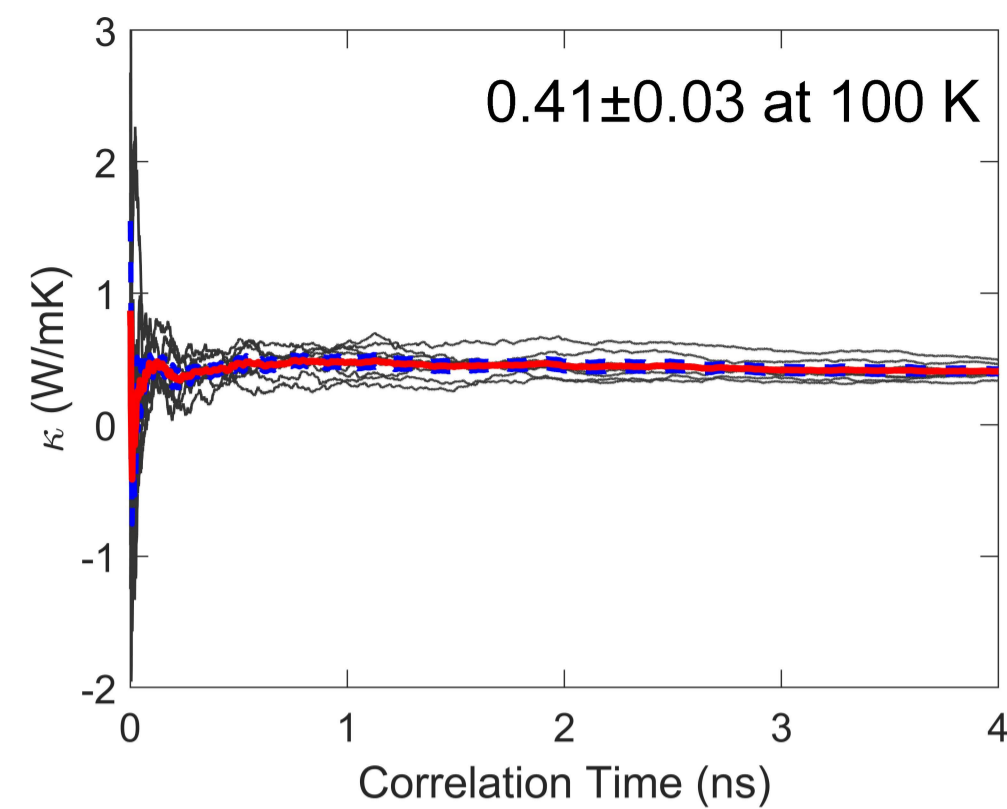

(d)

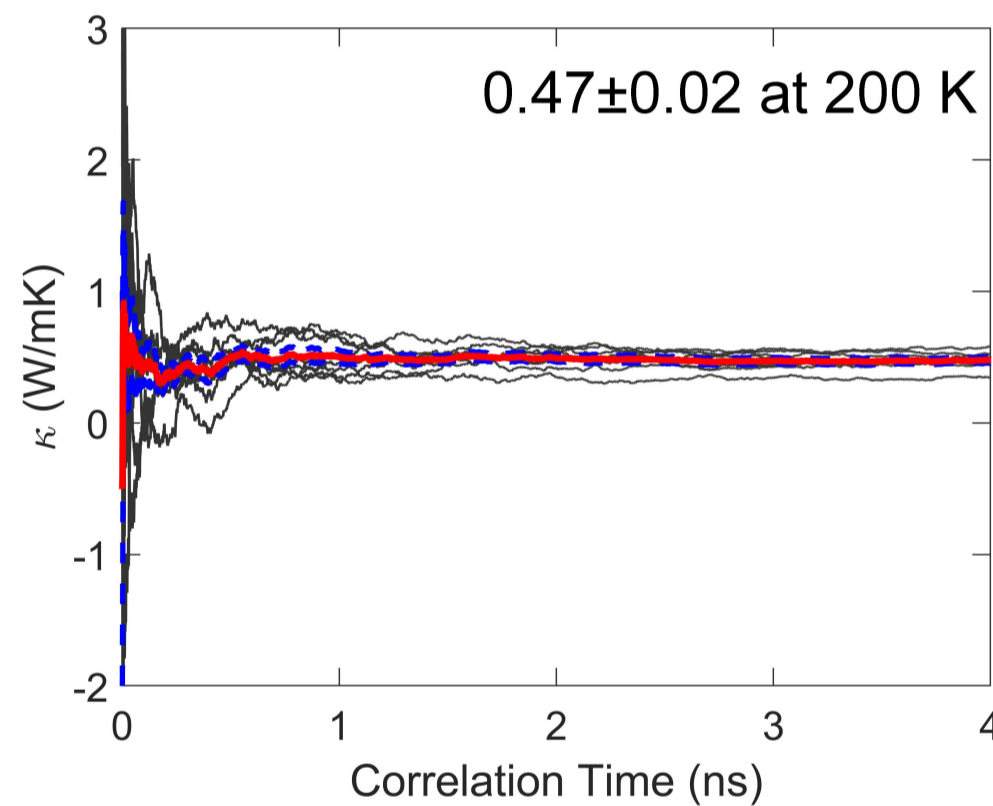

(e)

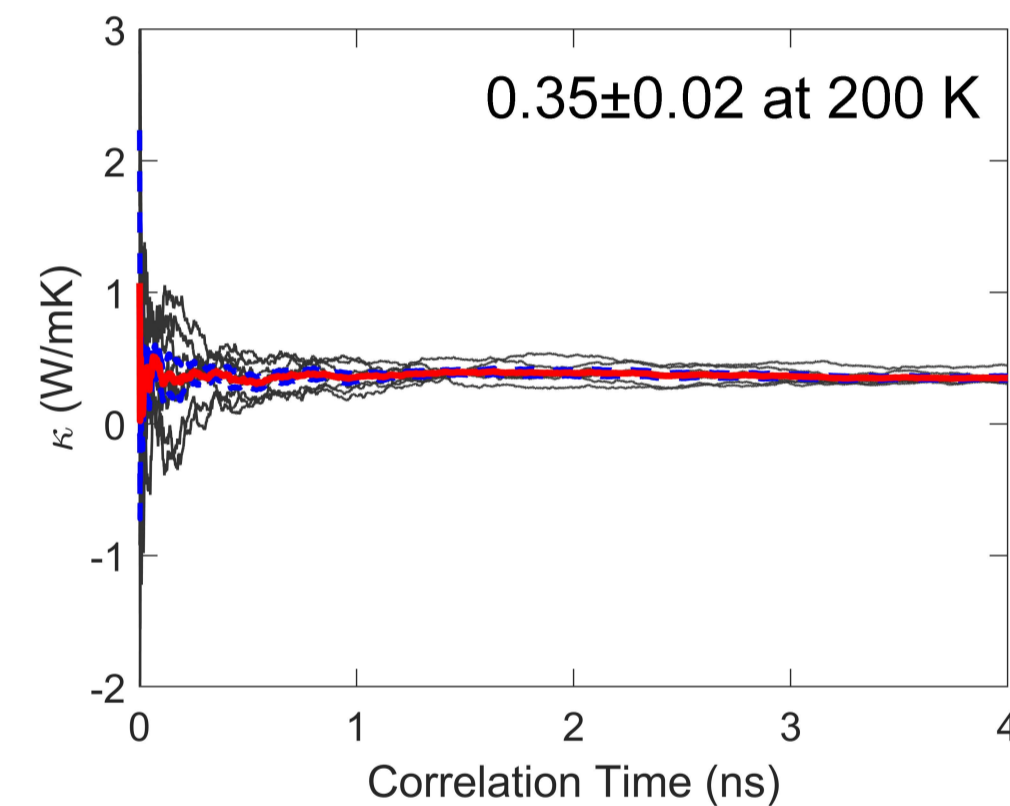

(f)

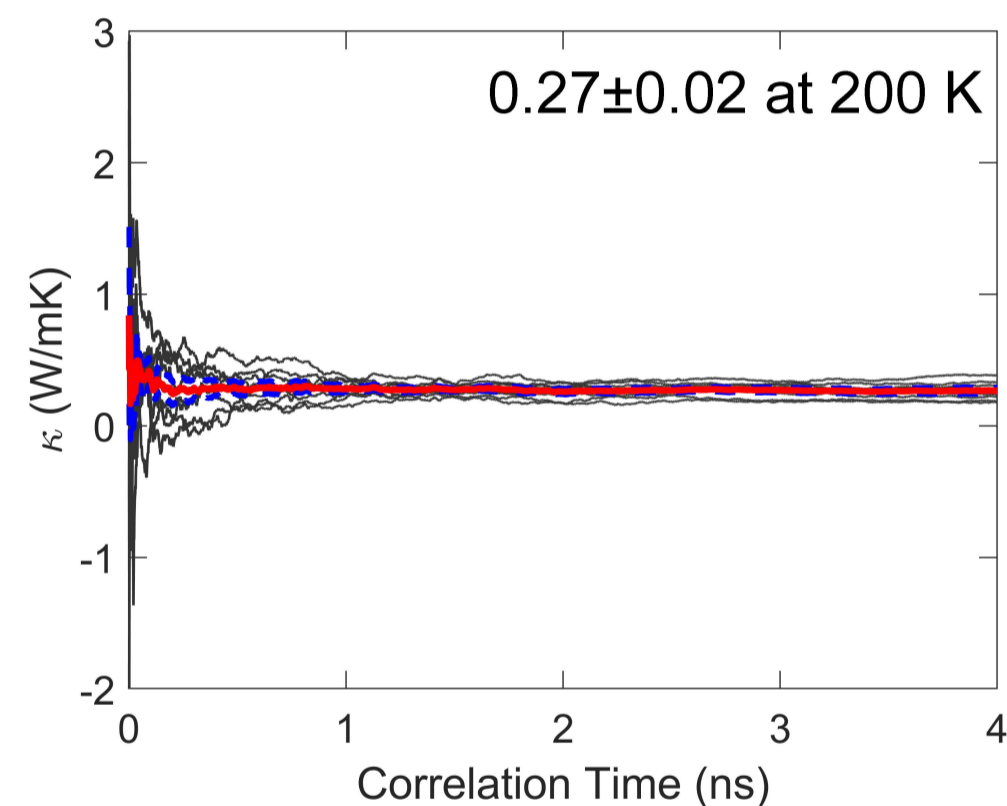

(g)

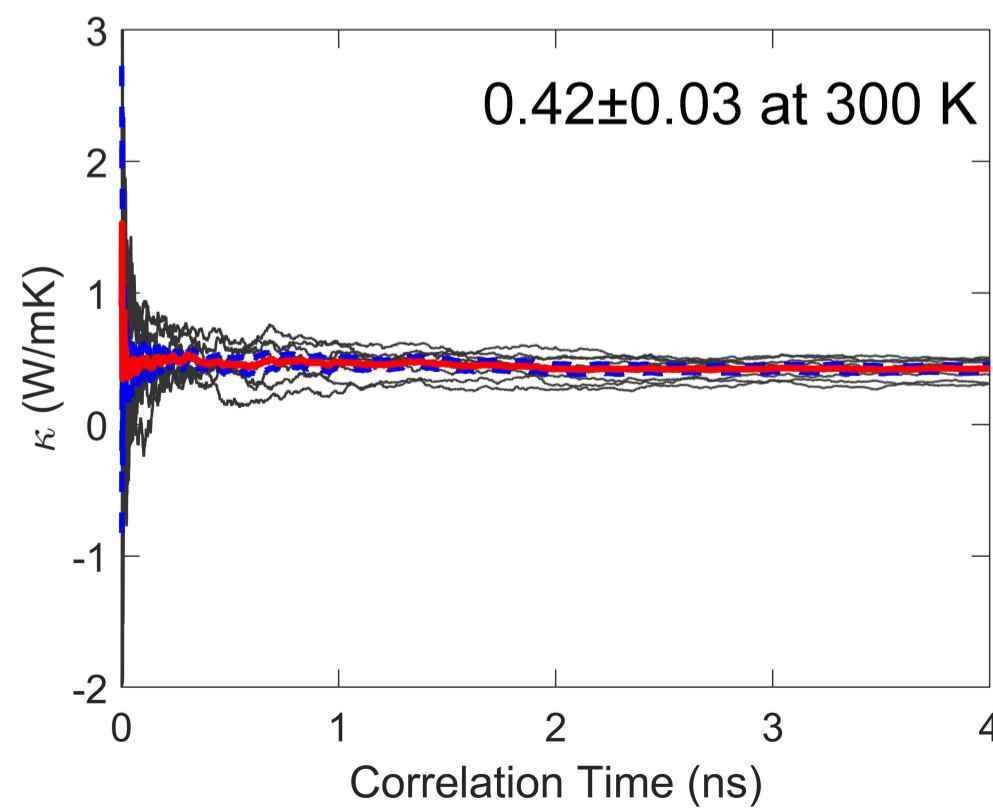

(h)

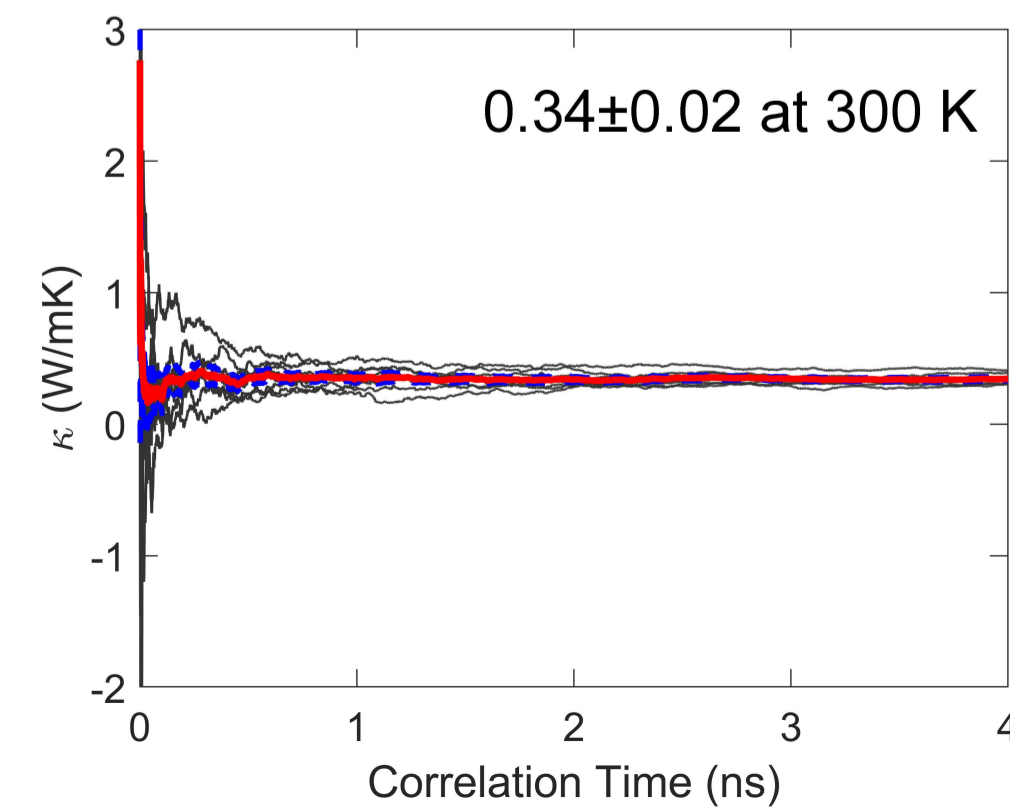

(i)

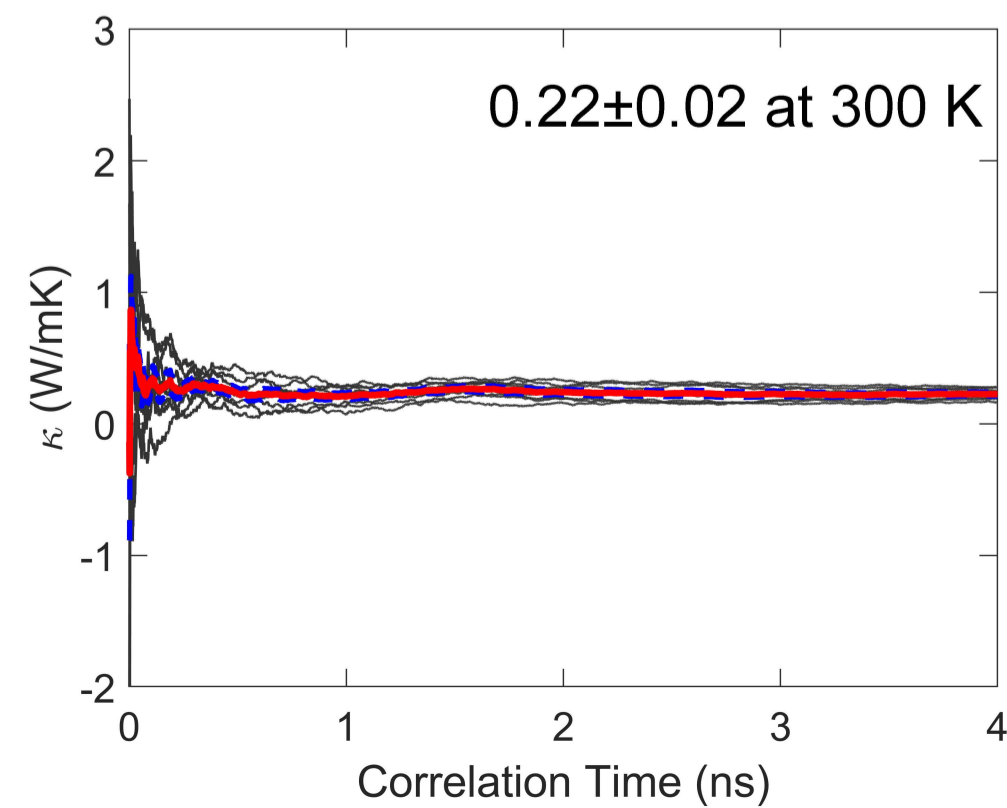

Supplement: d3cp04657e5.pdf [file d3cp04657e5.pdf]

(a)

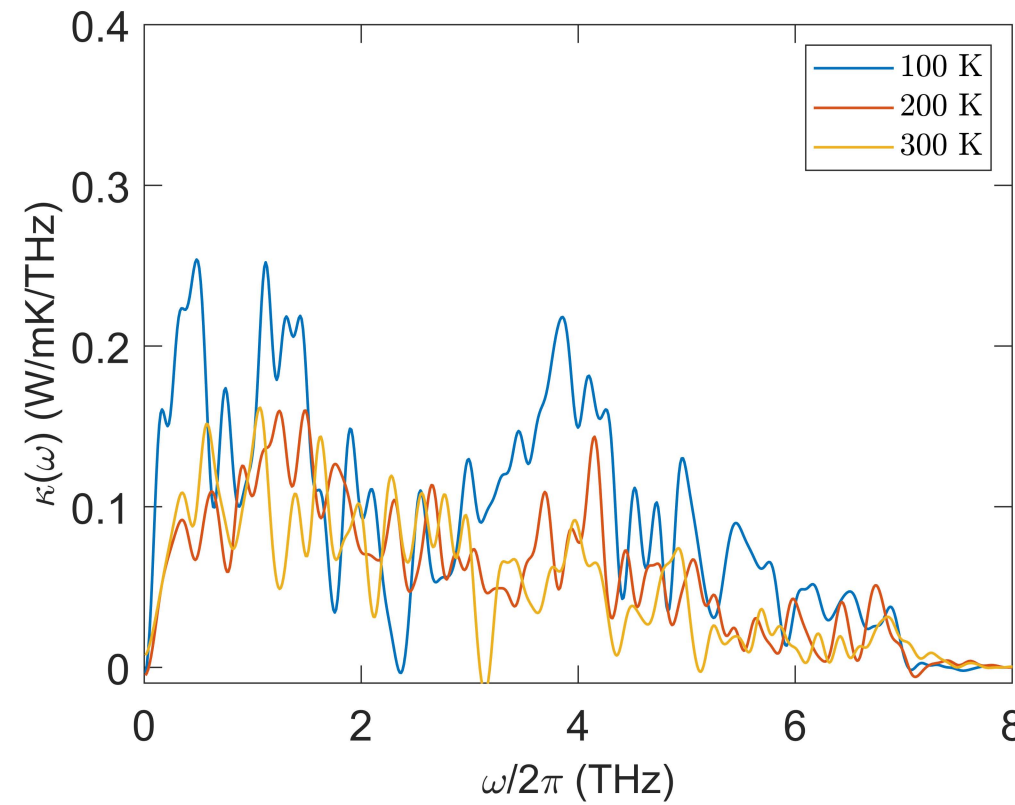

(b)

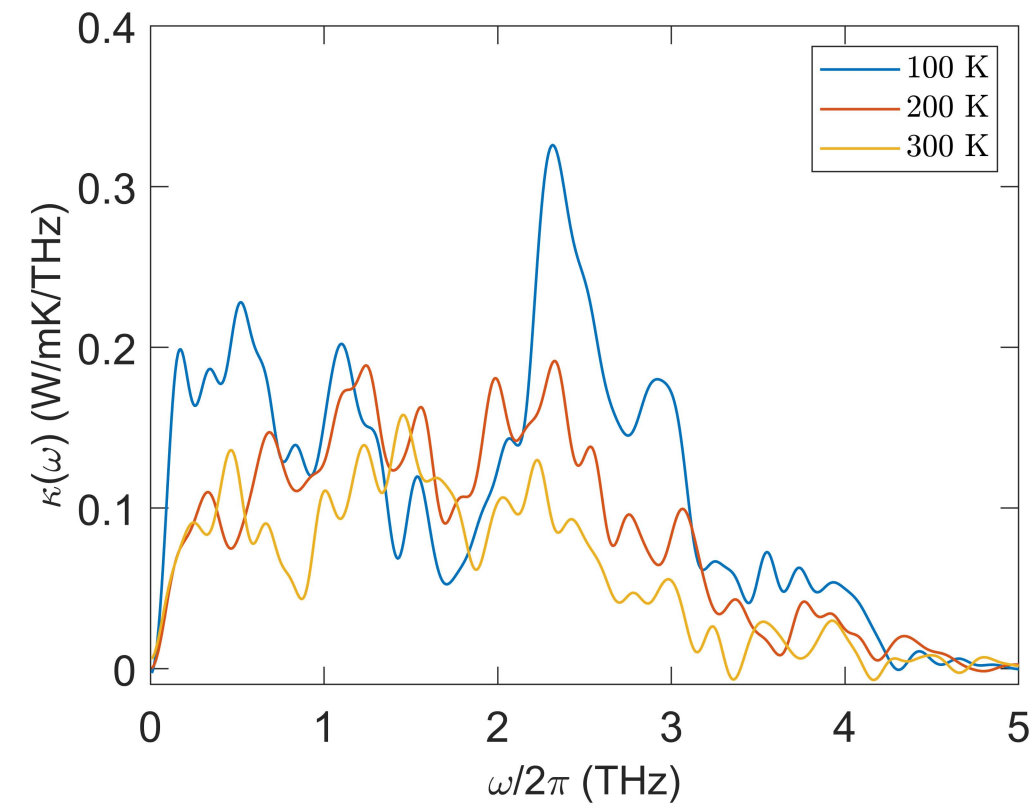

(c)

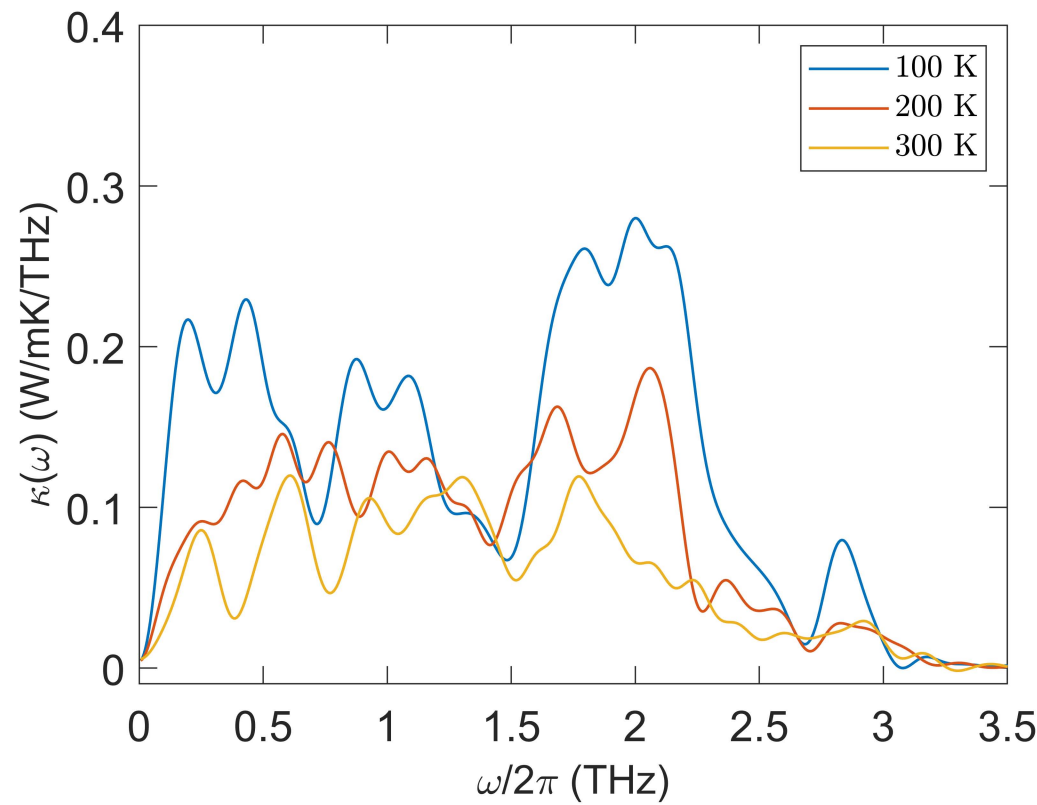

Supplement: d3cp04657e6.pdf [file d3cp04657e6.pdf]
